# Supplementary material
Source: publisher site journal article supplement (https://www.dovepress.com/article/supplementary_file/612956/612956_Supplementary%20Table%201.docx)
Supplement: Supplementary file 1 [file 612956_Supplementary%20Table%201.docx]

**Supplementary Table 1: Disease-Specific Pathological Features and Nanozyme Design Priorities in Arthritis Therapy**

| **Dimension** | **Rheumatoid Arthritis (RA)** | | **Osteoarthritis (OA)** | **Gouty Arthritis (GA)** |
| --- | --- | --- | --- | --- |
| **Pathological nature** | Autoimmune-driven inflammatory disease | | Degenerative cartilage disorder | Crystal-induced acute inflammation |
| **Pathogenic drivers** | Autoantibodies, T-cell dysregulation, synovial hyperplasia | Mechanical stress, chondrocyte senescence, metabolic dysregulation | | MSU crystal deposition, purine metabolic disorders |
| **Inflammatory pathways** | NF-κB, MAPK, JAK-STAT, HIF-1α | NF-κB, MAPK, cGAS-STING | | NF-κB, NLRP3, TLR4/MyD88 |
| **Nanozymes function** | Immunomodulation and hypoxia relief | Chondroprotection and mitochondrial quality control | | Rapid ROS scavenging and uric acid metabolic regulation |
| **Enzyme-mimetic activities** | SOD-like / CAT-like with oxygen generation | Mitochondria-targeted SOD/CAT-like activities | | SOD-like / CAT-like combined with UOD-like activity |
| **Target cells** | Synovial fibroblasts, T cells, macrophages | Chondrocytes | | Macrophages (particularly MSU-phagocytosing macrophages) |
| **Disease-specific mechanisms** | NETs degradation, HIF-1α/VEGF suppression, vascular pannus inhibition | Nrf2 activation, PINK1/Parkin-mediated mitophagy, cartilage matrix preservation | | Purine metabolic modulation (XDH/PKM downregulation), NLRP3 inflammasome inhibition |
| CAT: Catalase; SOD: Superoxide dismutase; MSU: Monosodium urate; UOD: Urate oxidase | | | | |
